# Supplementary material for: Fallos terapéuticos en el control antiparasitario ovino
Source: Hindawi journal article supplement (doi:10.1155/2022/8976179), 2011-01-01

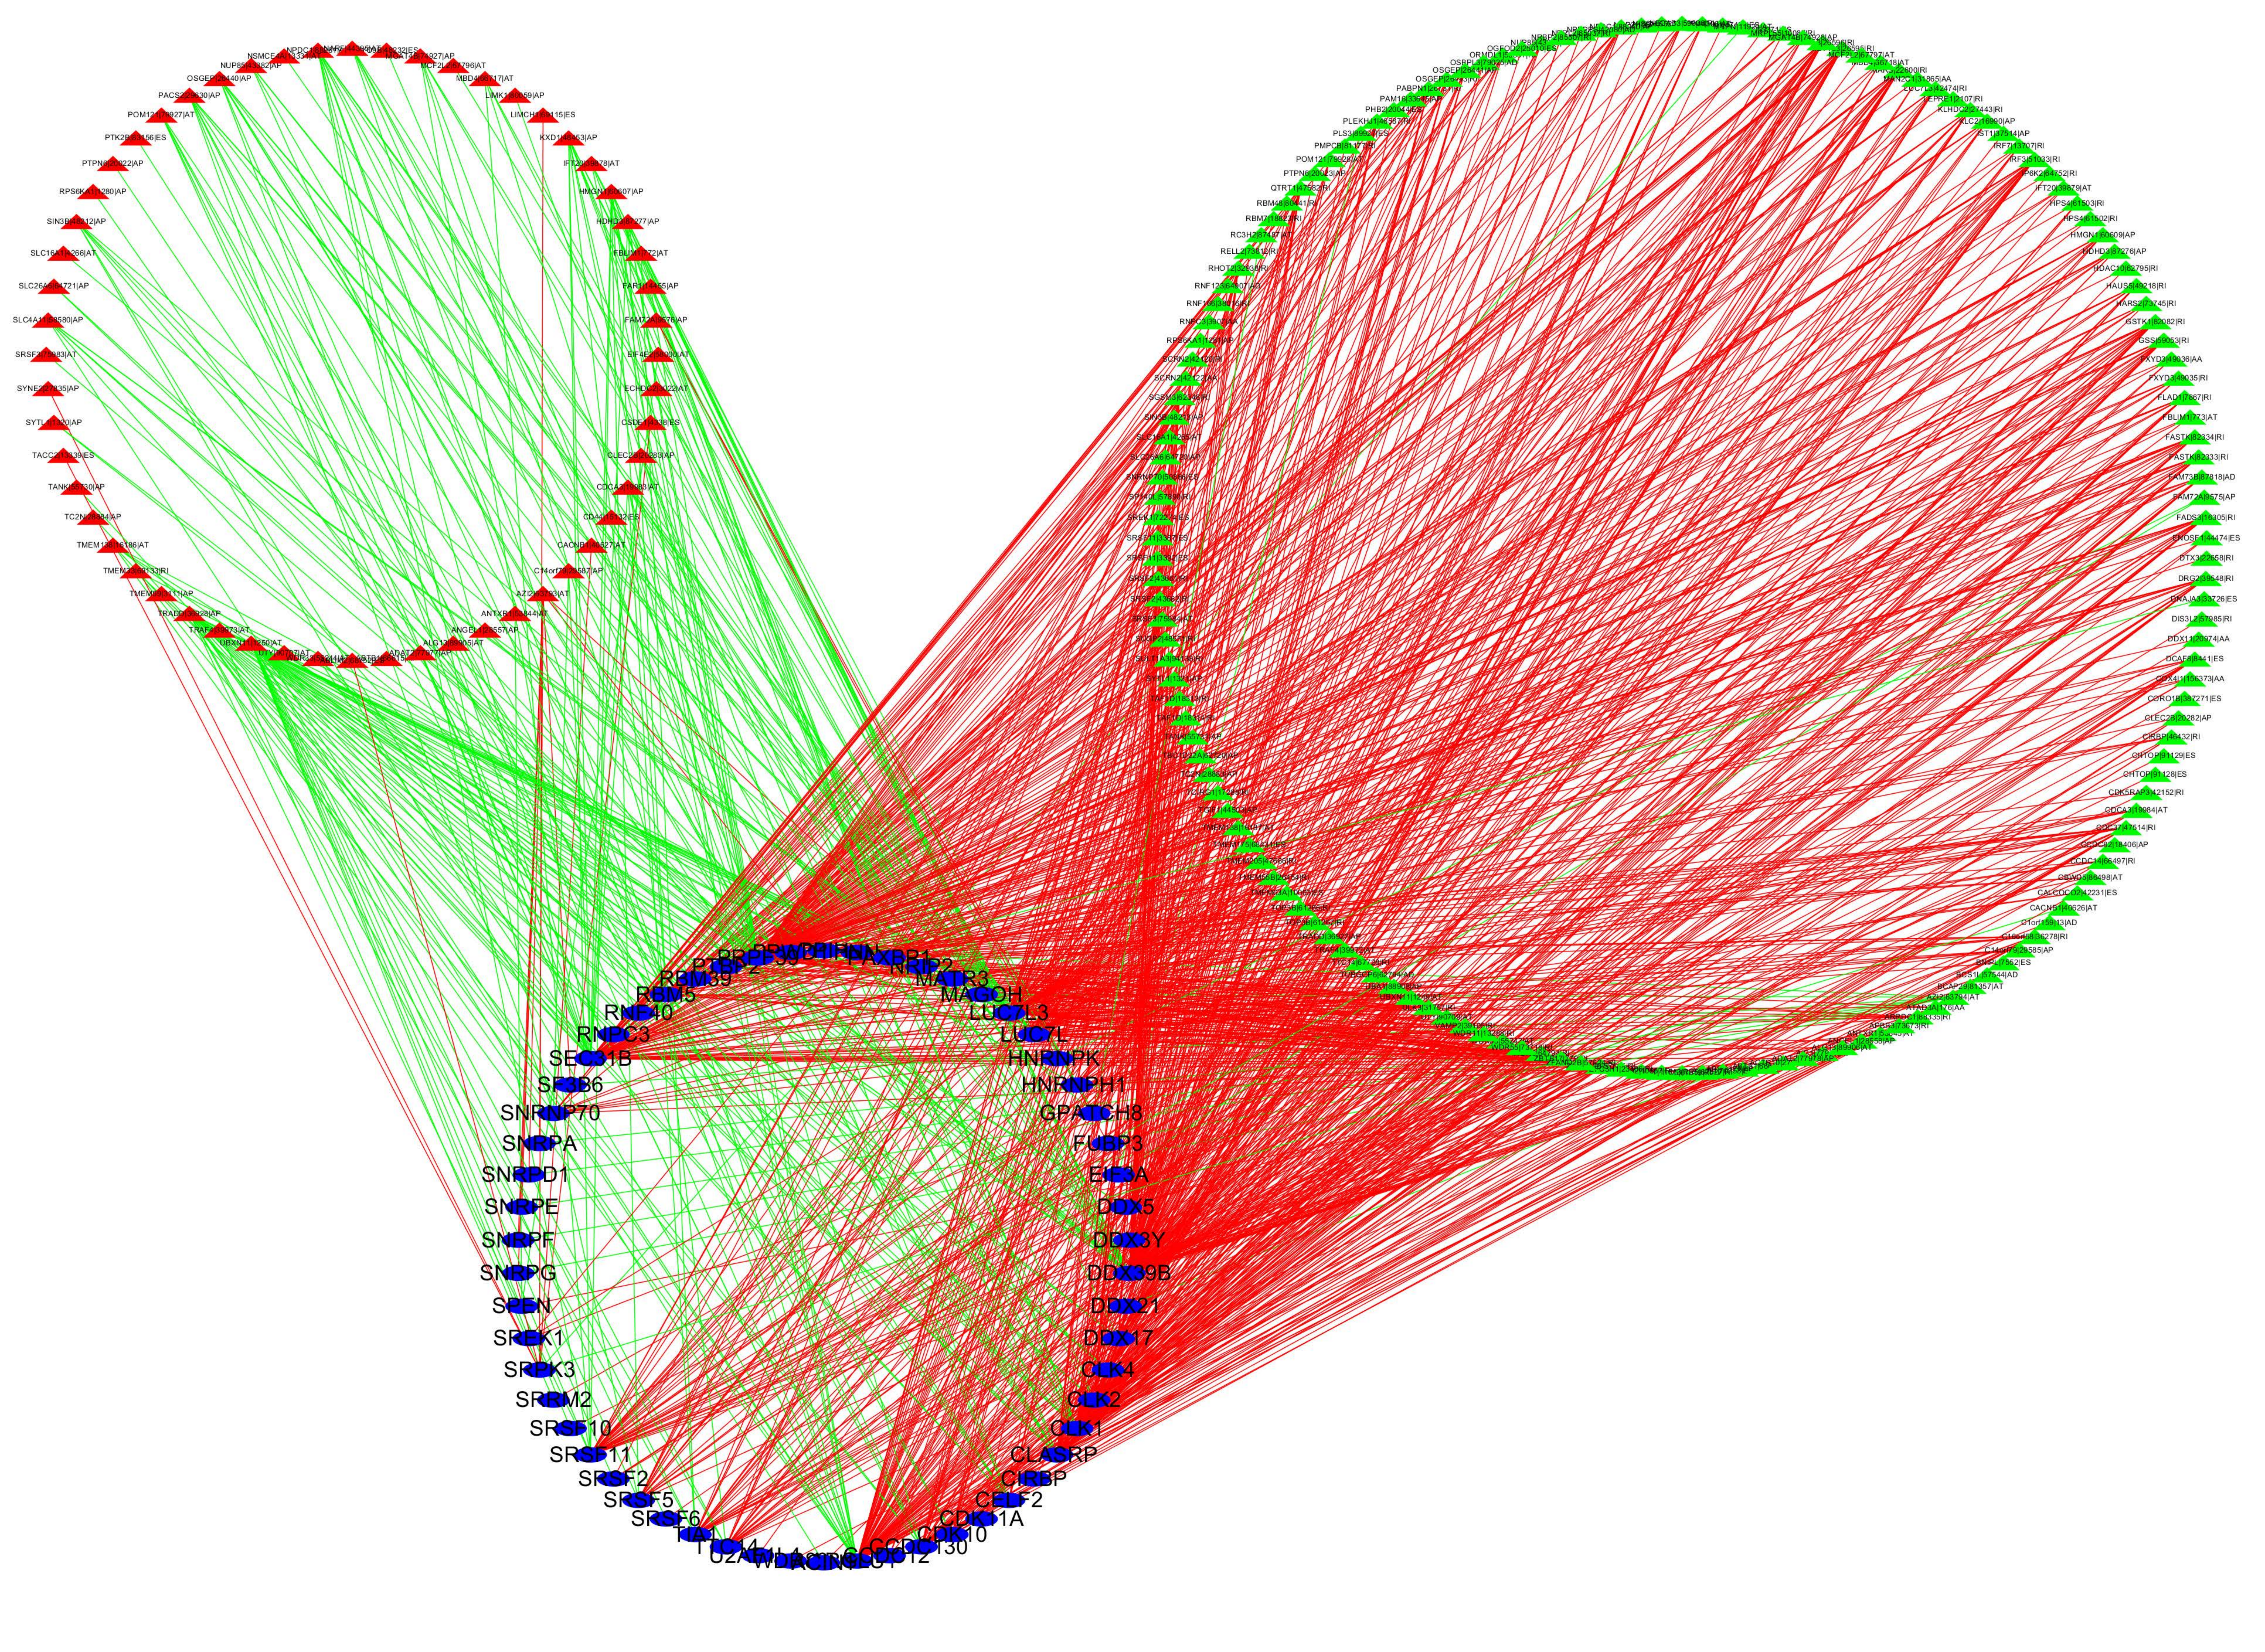

Supplement: f1 [file 8976179.f1.pdf]
